# Supplementary material for: Small RNA Sequencing of Sporadic Amyotrophic Lateral Sclerosis Cerebrospinal Fluid Reveals Differentially Expressed miRNAs Related to Neural and Glial Activity
Source: PubMed Central journal article supplement (PMC5767269; doi:10.3389/fnins.2017.00731), 2018-01-09

# Supplementary Figure 1

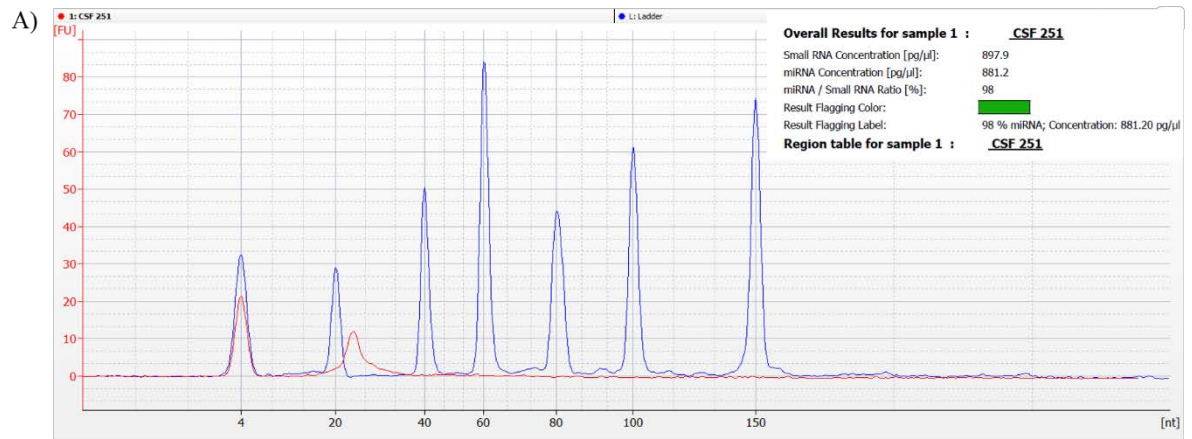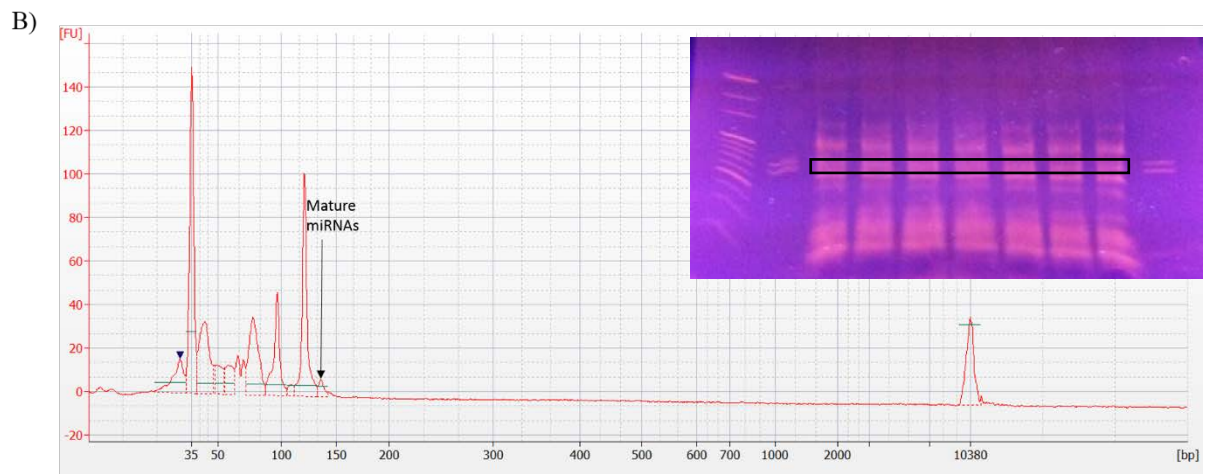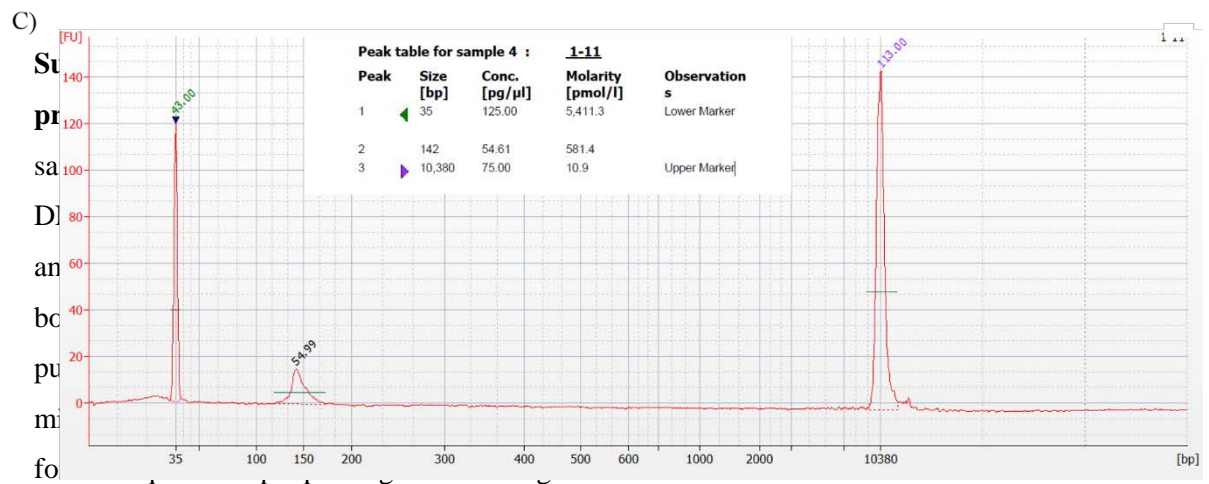

Supplement: Image1.pdf [file Image1.pdf]
