# Supplementary material for: Small RNA Sequencing of Sporadic Amyotrophic Lateral Sclerosis Cerebrospinal Fluid Reveals Differentially Expressed miRNAs Related to Neural and Glial Activity
Source: PubMed Central journal article supplement (PMC5767269; doi:10.3389/fnins.2017.00731), 2018-01-09

## Supplementary Figure 2

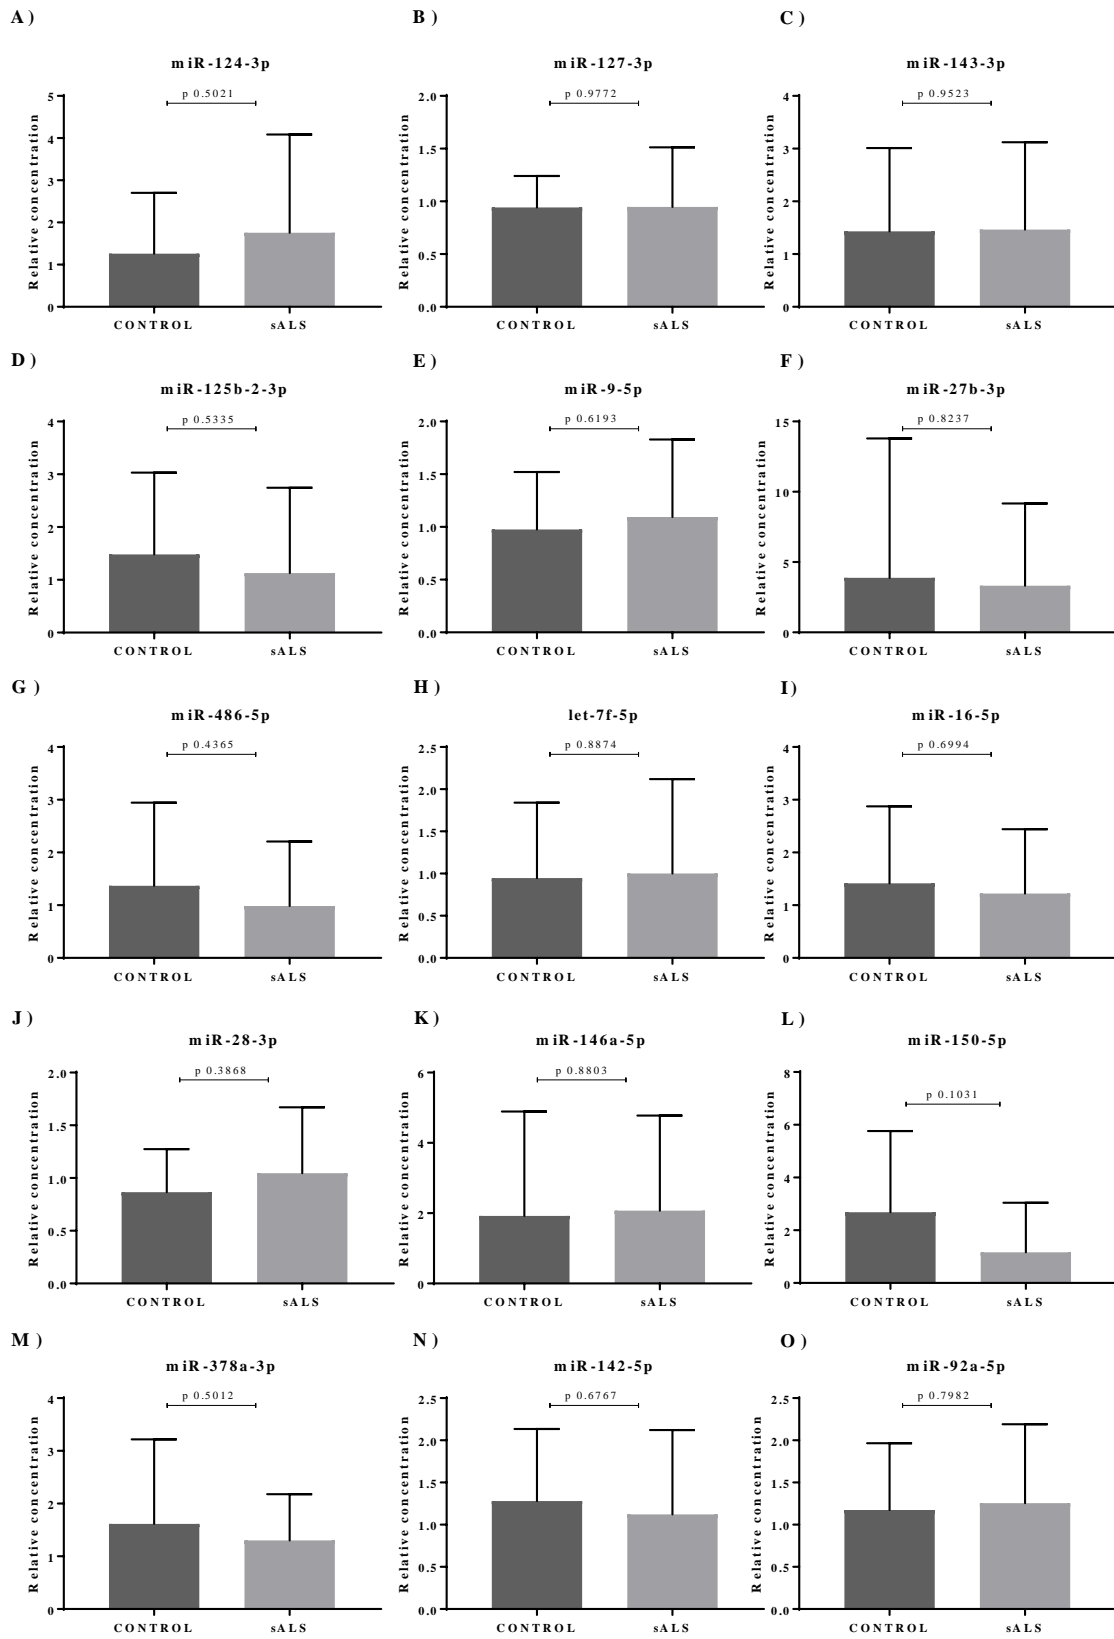

Supplement: Image2.pdf [file Image2.pdf]
